# Supplementary material for: Effects of fruit and vegetable intake on memory and attention: a systematic review of randomized controlled trials
Source: PubMed Central journal article supplement (PMC11157787; doi:10.1186/s13643-024-02547-8), 2024-06-07
Supplement: 13643_2024_2547_MOESM1_ESM.pdf [file 13643_2024_2547_MOESM1_ESM.pdf]

**Appendix 1: Search Terms of Fruits and Vegetable and different types of attention and memory in RCT design**

| Search | Search terms                                                                                                                                                                                                                                         | Ebscohost (Medline, APA PsychArticles, APA PsycInfo, CINAHL) | ProQuest Central | PubMed    | EMBASE    | Web of Science |
|--------|------------------------------------------------------------------------------------------------------------------------------------------------------------------------------------------------------------------------------------------------------|--------------------------------------------------------------|------------------|-----------|-----------|----------------|
| #1     | Fruit OR vegetable OR plant capsule                                                                                                                                                                                                                  | 173,074                                                      | 1,806,661        | 95,540    | 107,932   | 336,901        |
| #2     | selective attention OR divided attention OR sustained attention OR attention                                                                                                                                                                         | 832,035                                                      | 3,214,882        | 462,217   | 576,338   | 985,289        |
| #3     | memory OR sensory memory OR Short-term memory OR long-term memory OR working memory OR episodic memory OR semantic memory OR procedural memory OR autobiographical memory OR iconic memory OR echoic memory OR semantic memory OR declarative memory | 568,449                                                      | 2,094,286        | 276,572   | 346,180   | 652,121        |
| #4     | Intervention OR randomized OR RCT or placebo* OR clinical trial                                                                                                                                                                                      | 3,135,912                                                    | 2,188,065        | 1,359,100 | 1,970,924 | 2,154,737      |
| #5     | #1 AND #2 AND #3 AND #4                                                                                                                                                                                                                              | 18                                                           | 15               | 9         | 14        | 14             |

Appendix 1(a): Screenshot search of Ebscohost

sunway library - Bing    A-Z Databases    Result List: TI ( S1 AND S2 AND S3 AND S4 )

https://web-b-ebshost.com.ezproxy.lancs.ac.uk/ehost/resultsadvanced?vid=11&sid=a516a014-e044-41d0-86d4-9446275050c4%40s...

Select / deselect all    **Search with AND**    **Search with OR**    **Delete Searches**    **Refresh Search Results**

| Search ID#                  | Search Terms                                                                                                                                                                                                                                                                                                                                                                                                                                                                                                             | Search Options                          | Actions                                                                                        |
|-----------------------------|--------------------------------------------------------------------------------------------------------------------------------------------------------------------------------------------------------------------------------------------------------------------------------------------------------------------------------------------------------------------------------------------------------------------------------------------------------------------------------------------------------------------------|-----------------------------------------|------------------------------------------------------------------------------------------------|
| <input type="checkbox"/> S5 | S1 AND S2 AND S3 AND S4                                                                                                                                                                                                                                                                                                                                                                                                                                                                                                  | Search modes - Find all my search terms | <a href="#">View Results (18)</a>   <a href="#">View Details</a>   <a href="#">Edit</a>        |
| <input type="checkbox"/> S4 | TI ( Intervention OR randomized OR RCT or placebo* OR clinical trial ) OR AB ( Intervention OR randomized OR RCT or placebo* OR clinical trial )                                                                                                                                                                                                                                                                                                                                                                         | Search modes - Find all my search terms | <a href="#">View Results (3,135,912)</a>   <a href="#">View Details</a>   <a href="#">Edit</a> |
| <input type="checkbox"/> S3 | TI ( memory OR sensory memory OR Short-term memory OR long-term memory OR working memory OR episodic memory OR semantic memory OR procedural memory OR autobiographical memory OR iconic memory OR echoic memory OR semantic memory OR declarative memory ) OR AB ( memory OR sensory memory OR Short-term memory OR long-term memory OR working memory OR episodic memory OR semantic memory OR procedural memory OR autobiographical memory OR iconic memory OR echoic memory OR semantic memory OR declarative me ... | Search modes - Find all my search terms | <a href="#">View Results (568,449)</a>   <a href="#">View Details</a>   <a href="#">Edit</a>   |
| <input type="checkbox"/> S2 | TI ( selective attention OR divided attention OR sustained attention OR attention ) OR AB ( selective attention OR divided attention OR sustained attention OR attention )                                                                                                                                                                                                                                                                                                                                               | Search modes - Find all my search terms | <a href="#">View Results (832,035)</a>   <a href="#">View Details</a>   <a href="#">Edit</a>   |
| <input type="checkbox"/> S1 | TI ( Fruit OR vegetable OR plant capsule ) OR AB ( Fruit OR vegetable OR plant capsule )                                                                                                                                                                                                                                                                                                                                                                                                                                 | Search modes - Find all my search terms | <a href="#">View Results (173,074)</a>   <a href="#">View Details</a>   <a href="#">Edit</a>   |

Search Results: 1 - 18 of 18    Relevance ▾    Page Options ▾    Share ▾

Note: Exact duplicates removed from the results.

10:51 AM 10-Oct-21    29°C Mostly sunny

Appendix 1 (b): Screenshot search for Web of Science

Advanced Search - Web of Science

www-webofscience-com.ezproxy.sunway.edu.my/wos/woscc/advanced-search

Apps DISTED License Research SR Sunway QR Code Generator... Bit.do URL Shorten... Research Grant conference Other bookmarks Reading list

History Clear History

| Item | Search Query                                                                                                                                                                                                                                                                                                                                                                                                                                                                                   | Actions            | Results   |
|------|------------------------------------------------------------------------------------------------------------------------------------------------------------------------------------------------------------------------------------------------------------------------------------------------------------------------------------------------------------------------------------------------------------------------------------------------------------------------------------------------|--------------------|-----------|
| 5    | (((#1) AND #2) AND #3) AND #4                                                                                                                                                                                                                                                                                                                                                                                                                                                                  | Edit Add to Search | 14        |
| 4    | Intervention OR randomized OR RCT or placebo* OR clinical trial (Title) or Intervention OR randomized OR RCT or placebo* OR clinical trial (Abstract)                                                                                                                                                                                                                                                                                                                                          | Edit Add to Search | 2,154,737 |
| 3    | memory OR sensory memory OR Short-term memory OR long-term memory OR working memory OR episodic memory OR semantic memory OR procedural memory OR autobiographical memory OR iconic memory OR echoic memory OR semantic memory OR declarative memory (Title) or memory OR sensory memory OR Short-term memory OR long-term memory OR working memory OR episodic memory OR semantic memory OR procedural memory OR autobiographical memory OR iconic memory OR echoic memory OR semantic memory | Edit Add to Search | 652,151   |
| 2    | selective attention OR divided attention OR sustained attention OR attention (Title) or selective attention OR divided attention OR sustained attention OR attention (Abstract)                                                                                                                                                                                                                                                                                                                | Edit Add to Search | 985,289   |
| 1    | Fruit OR vegetable OR plant capsule (Title) or Fruit OR vegetable OR plant capsule (Abstract)                                                                                                                                                                                                                                                                                                                                                                                                  | Edit Add to Search | 336,901   |

27 ?

Type here to search

29°C 10:25 AM 8/10/2021

Appendix 1(c): screenshot search for Proquest

Items selected: 4 [Delete](#) [Save](#) [Show all details](#) [Export all searches](#)

| <input type="checkbox"/>            | Set ▼ | Search                                                                                                                                                                                                                                                                                                                                                                                                                                                                                                                                                                                                                                                                                                                                                                                                                                                                                                                                      | Databases        | Results   | Actions   |
|-------------------------------------|-------|---------------------------------------------------------------------------------------------------------------------------------------------------------------------------------------------------------------------------------------------------------------------------------------------------------------------------------------------------------------------------------------------------------------------------------------------------------------------------------------------------------------------------------------------------------------------------------------------------------------------------------------------------------------------------------------------------------------------------------------------------------------------------------------------------------------------------------------------------------------------------------------------------------------------------------------------|------------------|-----------|-----------|
| <input type="checkbox"/>            | S5    | (ab(Fruit OR vegetable OR plant capsule) OR ti(Fruit OR vegetable OR plant capsule)) AND (ab(selective attention OR divided attention OR sustained attention OR attention) OR ti(selective attention OR divided attention OR sustained attention OR attention)) AND (ab(memory OR sensory memory OR Short-term memory OR long-term memory OR working memory OR episodic memory OR semantic memory OR procedural memory OR autobiographical memory OR iconic memory OR echoic memory OR semantic memory OR declarative memory) OR ti(memory OR sensory memory OR Short-term memory OR long-term memory OR working memory OR episodic memory OR semantic memory OR procedural memory OR autobiographical memory OR iconic memory OR echoic memory OR semantic memory OR declarative memory)) AND (ab(Intervention OR randomized OR RCT OR placebo* OR clinical trial) OR ti(Intervention OR randomized OR RCT OR placebo* OR clinical trial)) | ProQuest Central | 15        | Actions ▼ |
| <input checked="" type="checkbox"/> | S4    | ab(Intervention OR randomized OR RCT or placebo* OR clinical trial) OR ti(Intervention OR randomized OR RCT or placebo* OR clinical trial)                                                                                                                                                                                                                                                                                                                                                                                                                                                                                                                                                                                                                                                                                                                                                                                                  | ProQuest Central | 2,188,065 | Actions ▼ |
| <input checked="" type="checkbox"/> | S3    | ab(memory OR sensory memory OR Short-term memory OR long-term memory OR working memory OR episodic memory OR semantic memory OR procedural memory OR autobiographical memory OR iconic memory OR echoic memory OR semantic memory OR declarative memory) OR ti(memory OR sensory memory OR Short-term memory OR long-term memory OR working memory OR episodic memory OR semantic memory OR procedural memory OR autobiographical memory OR iconic memory OR echoic memory OR semantic memory OR declarative memory)                                                                                                                                                                                                                                                                                                                                                                                                                        | ProQuest Central | 2,694,286 | Actions ▼ |
| <input checked="" type="checkbox"/> | S2    | ab(selective attention OR divided attention OR sustained attention OR attention) OR ti(selective attention OR divided attention OR sustained attention OR attention)                                                                                                                                                                                                                                                                                                                                                                                                                                                                                                                                                                                                                                                                                                                                                                        | ProQuest Central | 3,214,882 | Actions ▼ |
| <input checked="" type="checkbox"/> | S1    | ab(Fruit OR vegetable OR plant capsule ) OR ti(Fruit OR vegetable OR plant capsule )                                                                                                                                                                                                                                                                                                                                                                                                                                                                                                                                                                                                                                                                                                                                                                                                                                                        | ProQuest Central | 1,806,661 | Actions ▼ |

Windows taskbar: Type here to search | 29°C Light rain | 11:45 AM 8/10/2021

Appendix 1(d): Screenshot search for Pubmed

The screenshot displays a web browser window with the following details:

- Browser Tab:** Advanced Search Results - PubMed
- Address Bar:** <https://pubmed.ncbi.nlm.nih.gov/advanced/>
- Search Results Table:**

| Search | Actions | Details | Query                                                                                                                                                                                                                                                                                                                                                                                                                                                                                                                                                                                                                                                                                                                                                                                                                                                                                 | Results   | Time     |
|--------|---------|---------|---------------------------------------------------------------------------------------------------------------------------------------------------------------------------------------------------------------------------------------------------------------------------------------------------------------------------------------------------------------------------------------------------------------------------------------------------------------------------------------------------------------------------------------------------------------------------------------------------------------------------------------------------------------------------------------------------------------------------------------------------------------------------------------------------------------------------------------------------------------------------------------|-----------|----------|
| #5     | ...     | >       | Search: (((Fruit[Title/Abstract] OR vegetable[Title/Abstract] OR plant capsule[Title/Abstract]) AND (selective attention[Title/Abstract] OR divided attention[Title/Abstract] OR sustained attention[Title/Abstract] OR attention[Title/Abstract])) AND (memory[Title/Abstract] OR sensory memory[Title/Abstract] OR Short-term memory[Title/Abstract] OR long-term memory[Title/Abstract] OR working memory[Title/Abstract] OR episodic memory[Title/Abstract] OR semantic memory[Title/Abstract] OR procedural memory[Title/Abstract] OR autobiographical memory[Title/Abstract] OR iconic memory[Title/Abstract] OR echoic memory[Title/Abstract] OR semantic memory[Title/Abstract] OR declarative memory[Title/Abstract])) AND (Intervention[Title/Abstract] OR randomized[Title/Abstract] OR RCT[Title/Abstract] OR placebo*[Title/Abstract] OR clinical trial[Title/Abstract]) | 9         | 23:55:18 |
| #4     | ...     | >       | Search: Intervention[Title/Abstract] OR randomized[Title/Abstract] OR RCT[Title/Abstract] OR placebo*[Title/Abstract] OR clinical trial[Title/Abstract]                                                                                                                                                                                                                                                                                                                                                                                                                                                                                                                                                                                                                                                                                                                               | 1,359,100 | 23:54:38 |
| #3     | ...     | >       | Search: memory[Title/Abstract] OR sensory memory[Title/Abstract] OR Short-term memory[Title/Abstract] OR long-term memory[Title/Abstract] OR working memory[Title/Abstract] OR episodic memory[Title/Abstract] OR semantic memory[Title/Abstract] OR procedural memory[Title/Abstract] OR autobiographical memory[Title/Abstract] OR iconic memory[Title/Abstract] OR echoic memory[Title/Abstract] OR semantic memory[Title/Abstract] OR declarative memory[Title/Abstract]                                                                                                                                                                                                                                                                                                                                                                                                          | 276,572   | 23:54:03 |
| #2     | ...     | >       | Search: selective attention[Title/Abstract] OR divided attention[Title/Abstract] OR sustained attention[Title/Abstract] OR attention[Title/Abstract]                                                                                                                                                                                                                                                                                                                                                                                                                                                                                                                                                                                                                                                                                                                                  | 462,217   | 23:52:38 |
| #1     | ...     | >       | Search: Fruit[Title/Abstract] OR vegetable[Title/Abstract] OR plant capsule[Title/Abstract]                                                                                                                                                                                                                                                                                                                                                                                                                                                                                                                                                                                                                                                                                                                                                                                           | 96,540    | 23:52:27 |
- Windows Taskbar:** Shows search bar, task icons (File Explorer, Edge, etc.), system tray (30°C, Light rain), and date/time (11:55 AM, 8/10/2021).

## Appendix 1 (e): Screenshot search for Embase

The screenshot shows the Ovid search interface with the following components:

- Browser Tabs:** A-Z Databases: E: embase, A-Z Databases: E, Ovid: Search Form.
- Address Bar:** ovidsp-dc2-ovid-com.ezproxy.lancs.ac.uk/ovid-a/ovidweb.cgi
- Navigation Bar:** Search, Journals, Books, Multimedia, My Workspace, What's New.
- Search History (5):**

| # | Searches                                                                                                                                                                                                                                                                                                                                                                                                                                                                                                                 | Results | Type     | Actions              | Annotations |
|---|--------------------------------------------------------------------------------------------------------------------------------------------------------------------------------------------------------------------------------------------------------------------------------------------------------------------------------------------------------------------------------------------------------------------------------------------------------------------------------------------------------------------------|---------|----------|----------------------|-------------|
| 2 | (selective attention or divided attention or sustained attention or attention).ab. or (selective attention or divided attention or sustained attention or attention).ti.                                                                                                                                                                                                                                                                                                                                                 | 576338  | Advanced | Display Results More | Expand      |
| 3 | (memory or sensory memory or Short-term memory or long-term memory or working memory or episodic memory or semantic memory or procedural memory or autobiographical memory or iconic memory or echoic memory or semantic memory or declarative memory).ab. or (memory or sensory memory or Short-term memory or long-term memory or working memory or episodic memory or semantic memory or procedural memory or autobiographical memory or iconic memory or echoic memory or semantic memory or declarative memory).ti. | 346180  | Advanced | Display Results More |             |
| 4 | (Intervention or randomized or RCT or placebo* or clinical trial).ab. or (Intervention or randomized or RCT or placebo* or clinical trial).ti.                                                                                                                                                                                                                                                                                                                                                                           | 1970924 | Advanced | Display Results More |             |
| 5 | 1 and 2 and 3 and 4                                                                                                                                                                                                                                                                                                                                                                                                                                                                                                      | 14      | Advanced | Display Results More |             |
- Search Options:** Save, Remove, Combine with: AND OR.
- Actions:** Save All, Edit, Create RSS, Create Auto-Alert, View Saved, Email All Search History, Copy Search History Link, Copy Search History Details.
- Footer:** Basic Search | Find Citation | Search Tools | Search Fields | Advanced Search | Multi-Field Search. 1 Resource selected | Hide | Change. Embase 1974 to 2021 October 07.
